# Supplementary material for: Evaluating the feasibility of creating a zero waste discharge aquaculture system
Source: Royal Society of Chemistry journal article supplement (doi:10.1039/d4ew01080a), 2025-01-01
Supplement: d4ew01080a1.pdf [file d4ew01080a1.pdf]

## Supplementary file

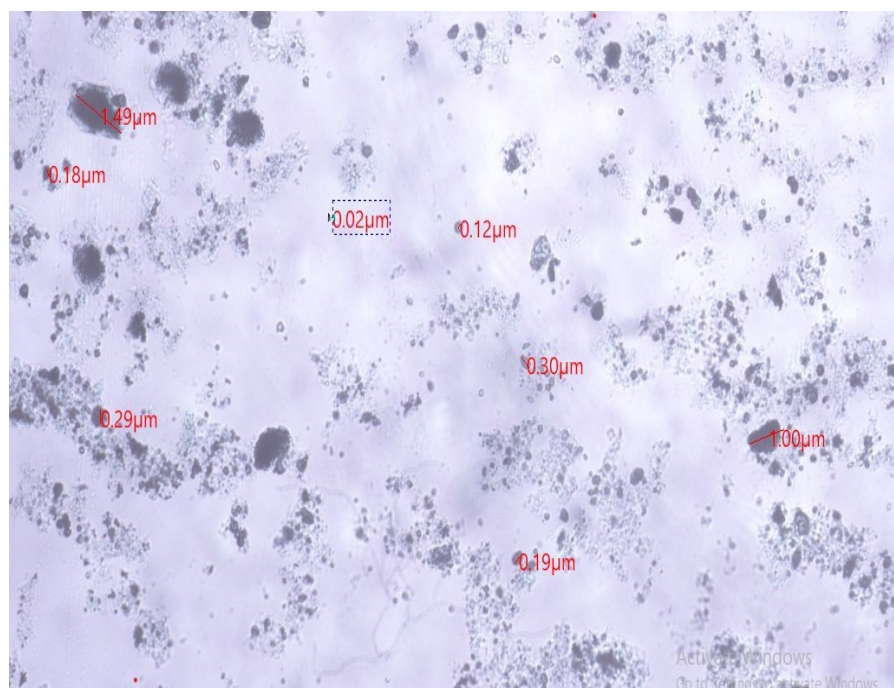

**SI Figure 1a:** GS flocs physiognomies and dimension

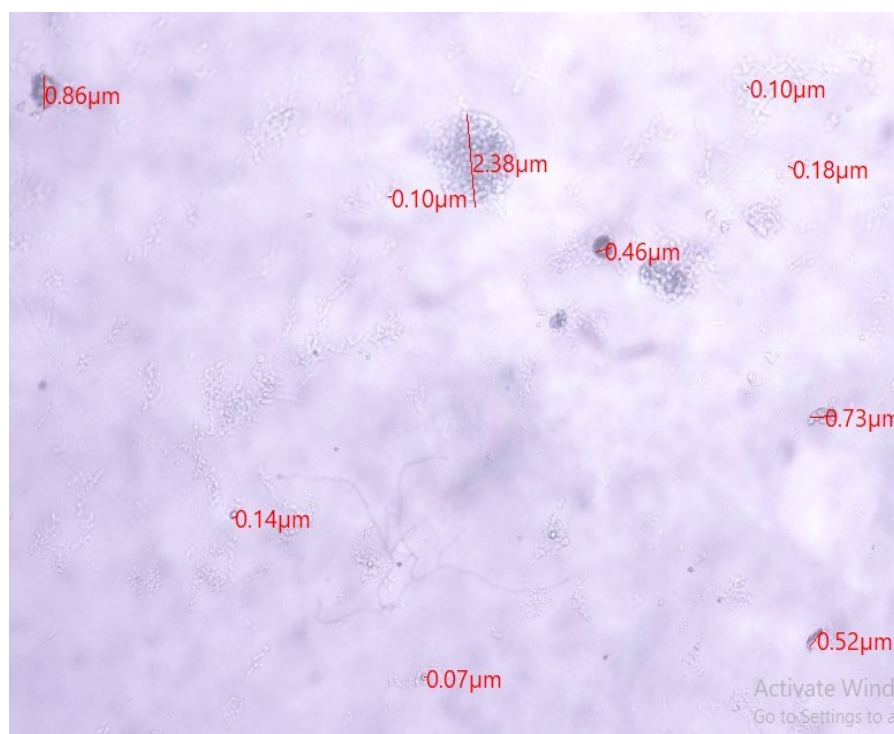

**SI Figure 1b:** MO flocs physiognomies and dimension

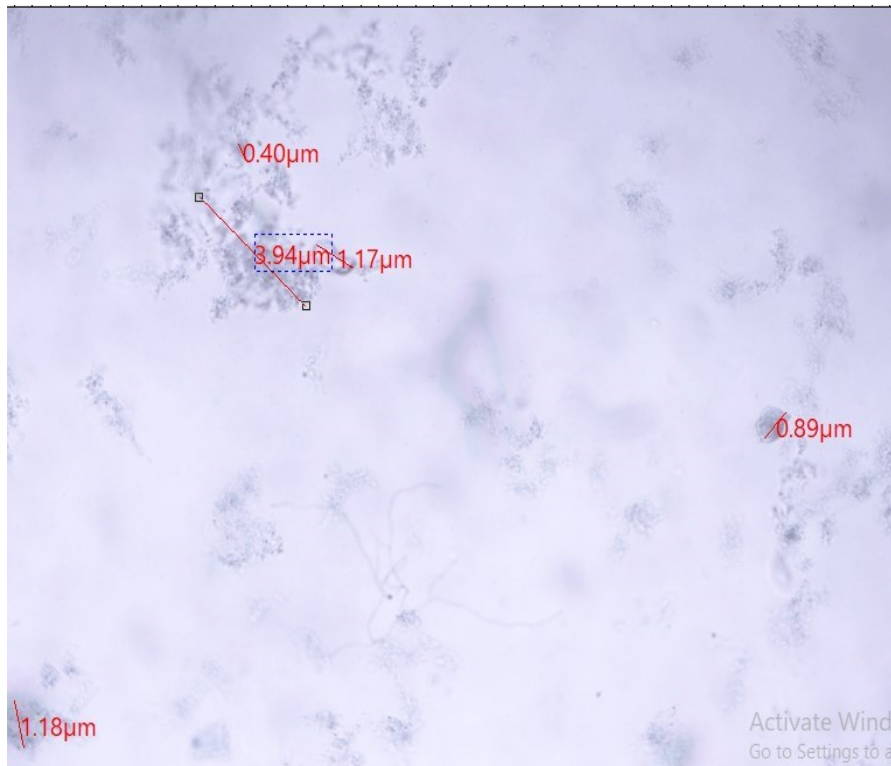

**SI Figure 1c:** CH flocs physiognomies and dimension

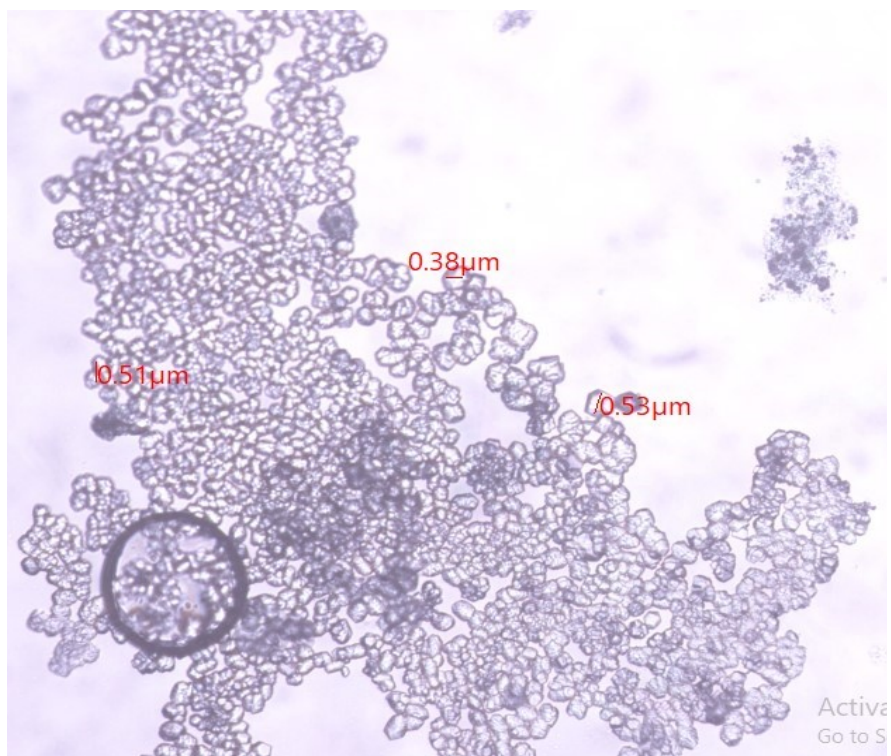

**SI Figure 1d:** MO-GS flocs physiognomies and dimension

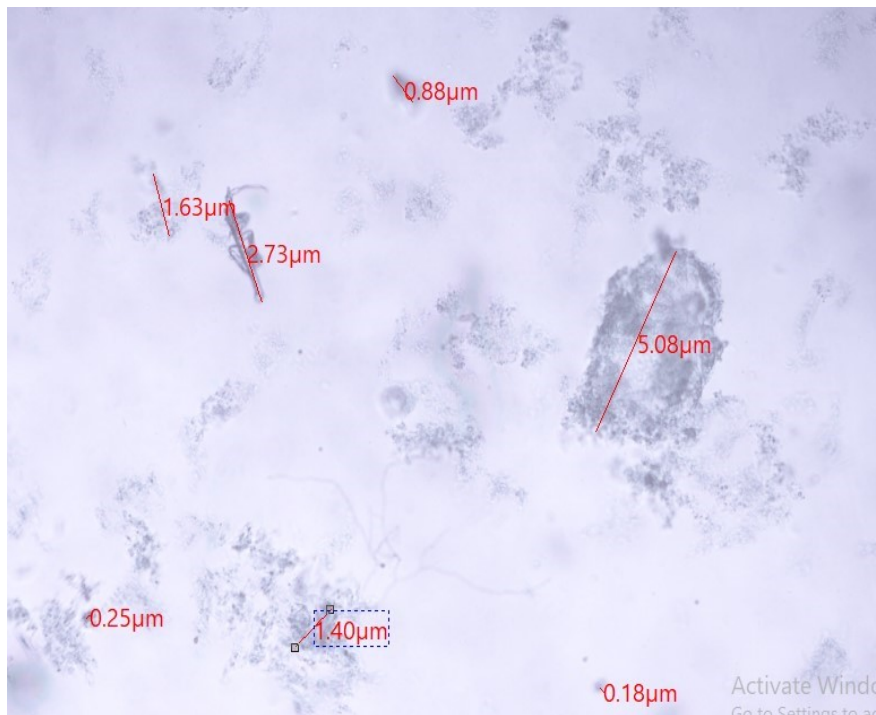

**SI Figure 1e:** CH-GS flocs physiognomies and dimension

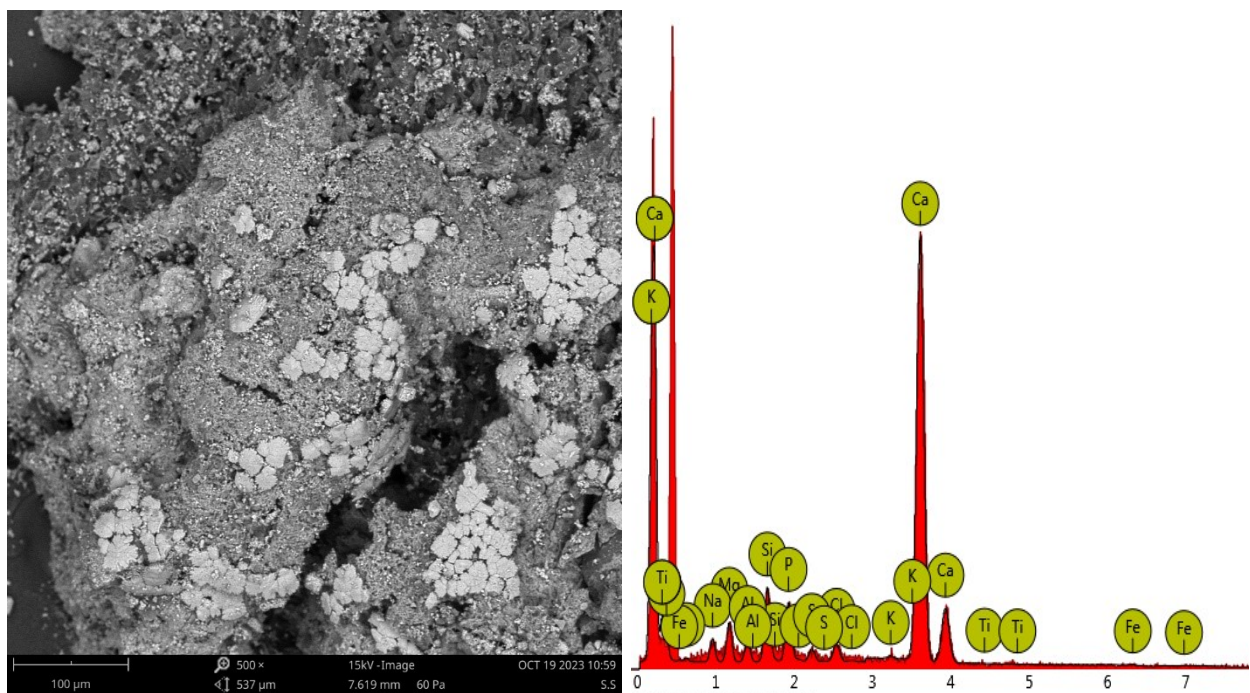

**SI Figure 2a:** SEM-EDX analysis of flocs recovered from GS system



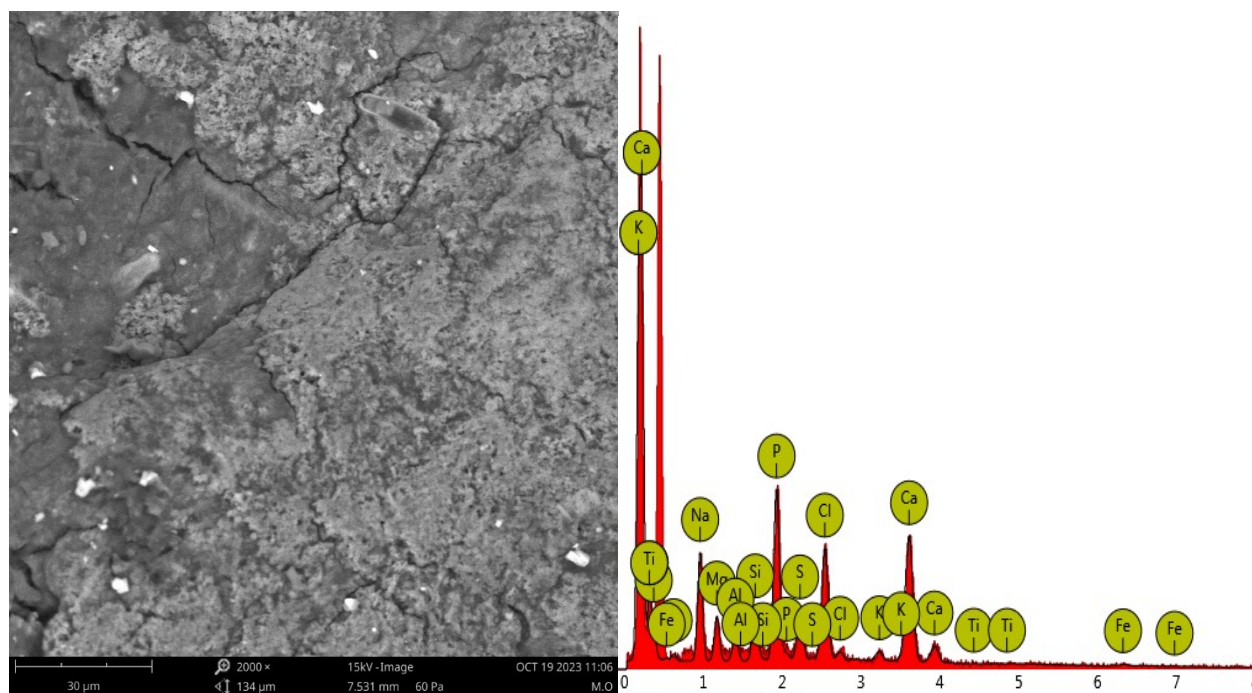

**SI Figure 2b:** SEM-EDX Analysis of Floccs recovered from MO system

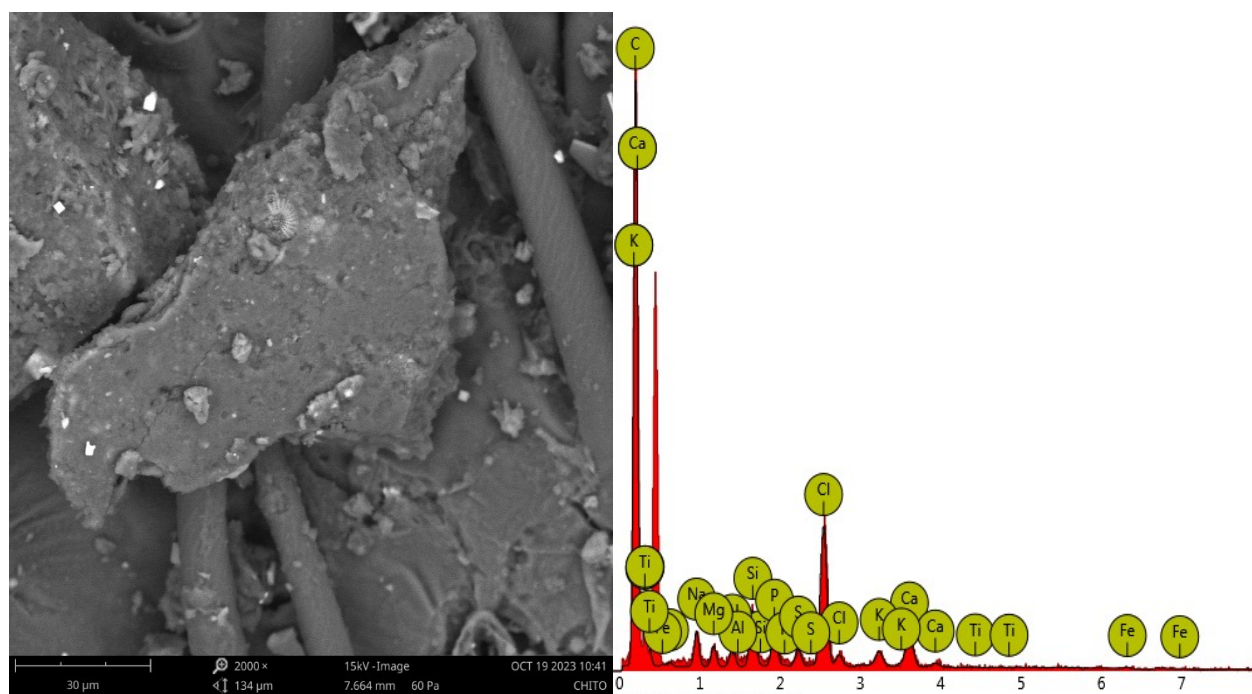

**SI Figure 2c:** SEM-EDX Analysis of recovered from CH Floccs

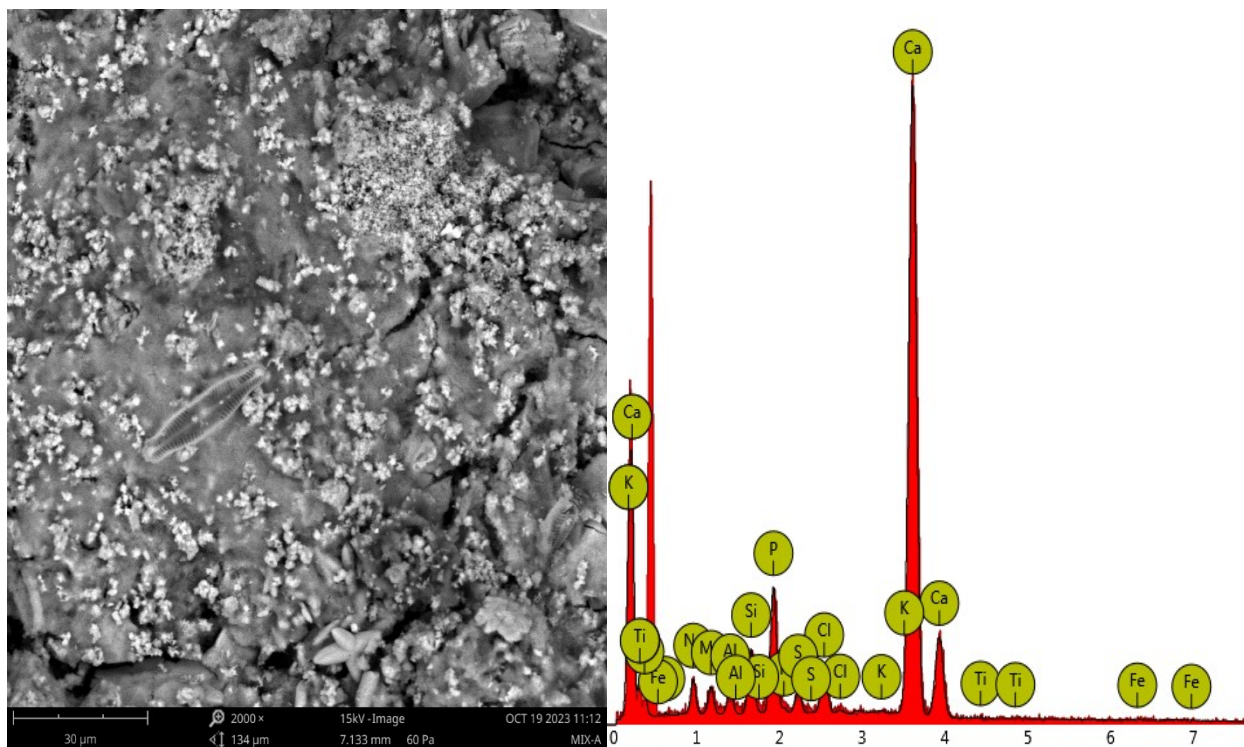

**SI Figure 2d:** SEM-EDX analysis of flocs recovered from MO-GS combo system

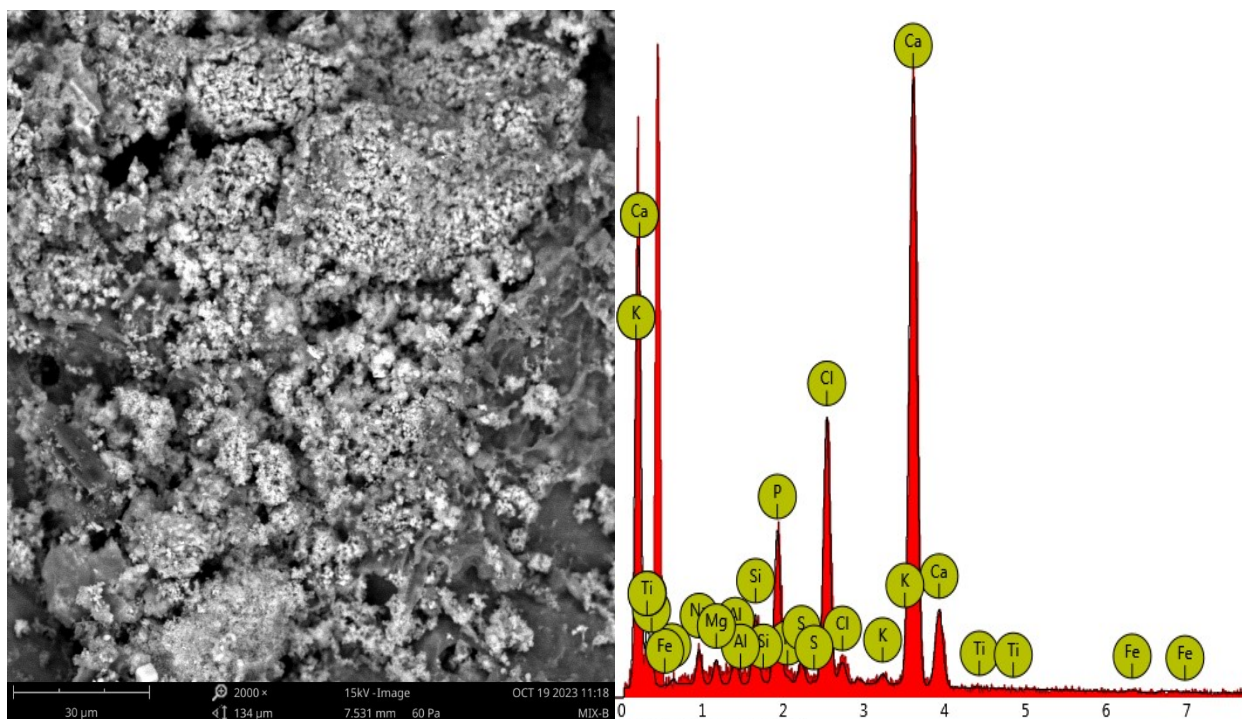

**SI Figure 2e:** SEM-EDX analysis of flocs recovered from CH-GS combo system
